# Supplementary material for: mTOR Hyperactivation by Ablation of Tuberous Sclerosis Complex 2 in the Mouse Heart Induces Cardiac Dysfunction with the Increased Number of Small Mitochondria Mediated through the Down-Regulation of Autophagy
Source: PubMed Central journal article supplement (PMC4811538; doi:10.1371/journal.pone.0152628), 2016-03-29
Supplement: pone.0152628.s001.pdf [file pone.0152628.s001.pdf]

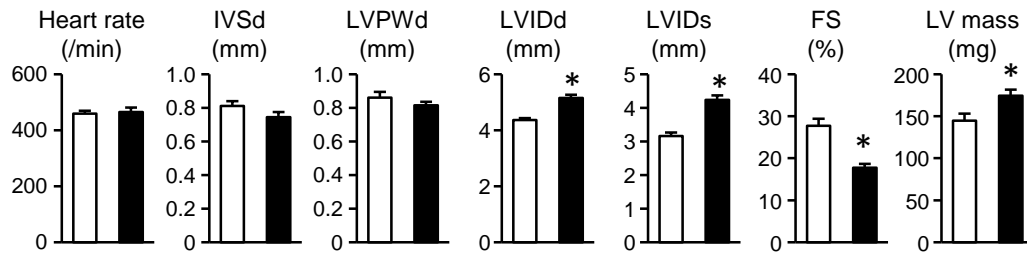

**S1 Fig. Echocardiographic analysis of the mice at 4 months of age under anaesthesia**

Open and closed bars represent *TSC2*<sup>+/+</sup> and *TSC2*<sup>-/-</sup> mice, respectively. Values represent the mean  $\pm$  S.E.M. of data from 5 mice in each group. \**P* < 0.05.
