# Supplementary material for: mTOR Hyperactivation by Ablation of Tuberous Sclerosis Complex 2 in the Mouse Heart Induces Cardiac Dysfunction with the Increased Number of Small Mitochondria Mediated through the Down-Regulation of Autophagy
Source: PubMed Central journal article supplement (PMC4811538; doi:10.1371/journal.pone.0152628), 2016-03-29
Supplement: pone.0152628.s002.pdf [file pone.0152628.s002.pdf]

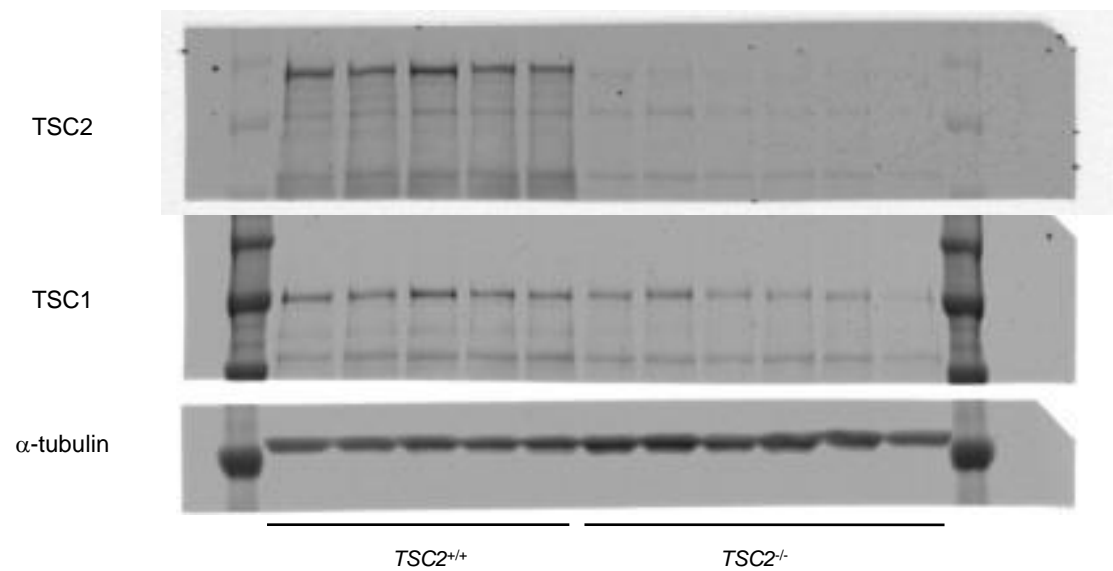

**S2A Fig. The original blots shown in Fig. 1.**

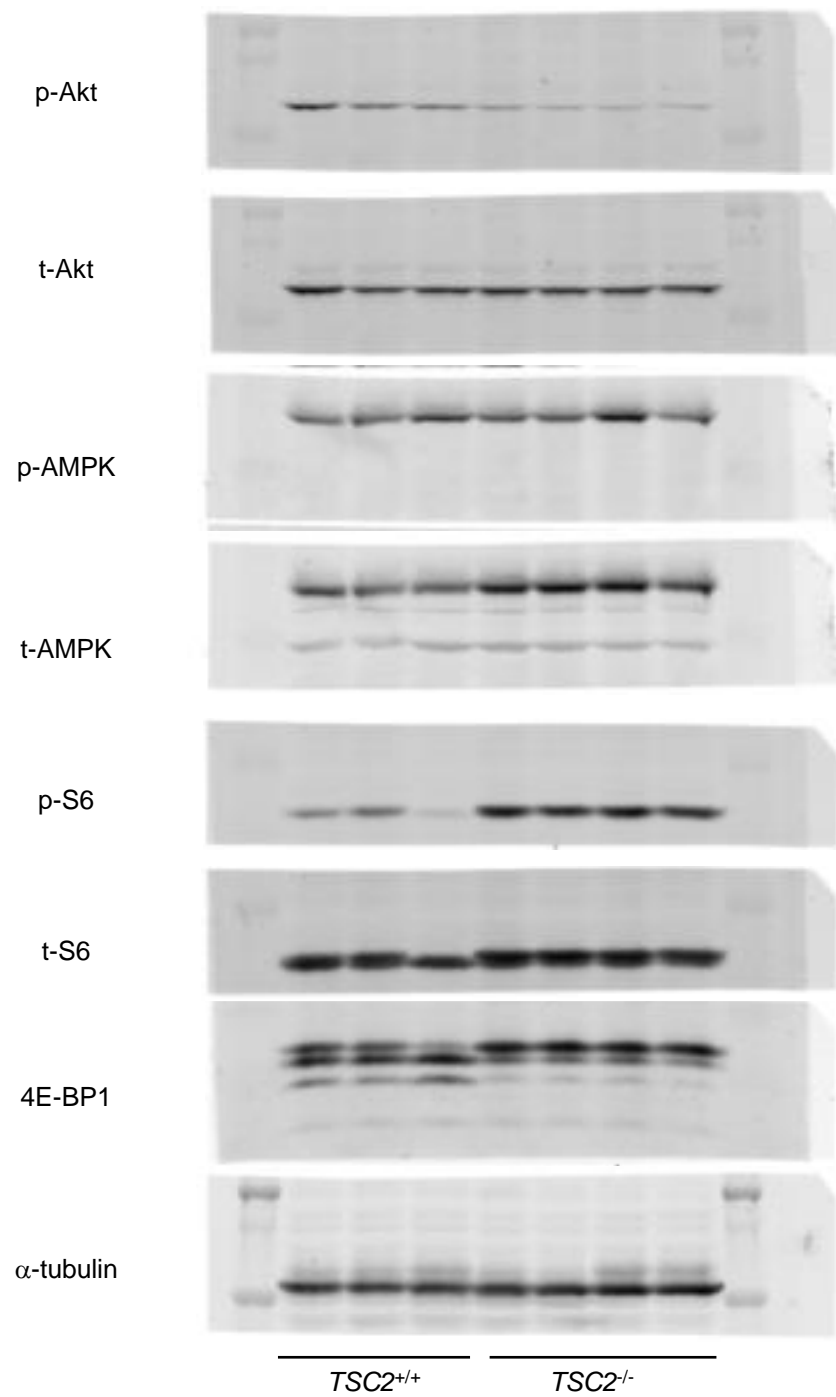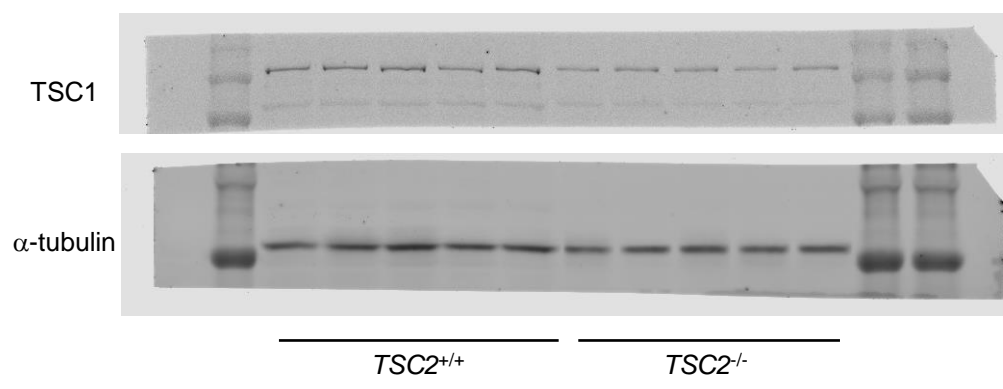

**S2B Fig. The original blots shown in Fig. 3A.**

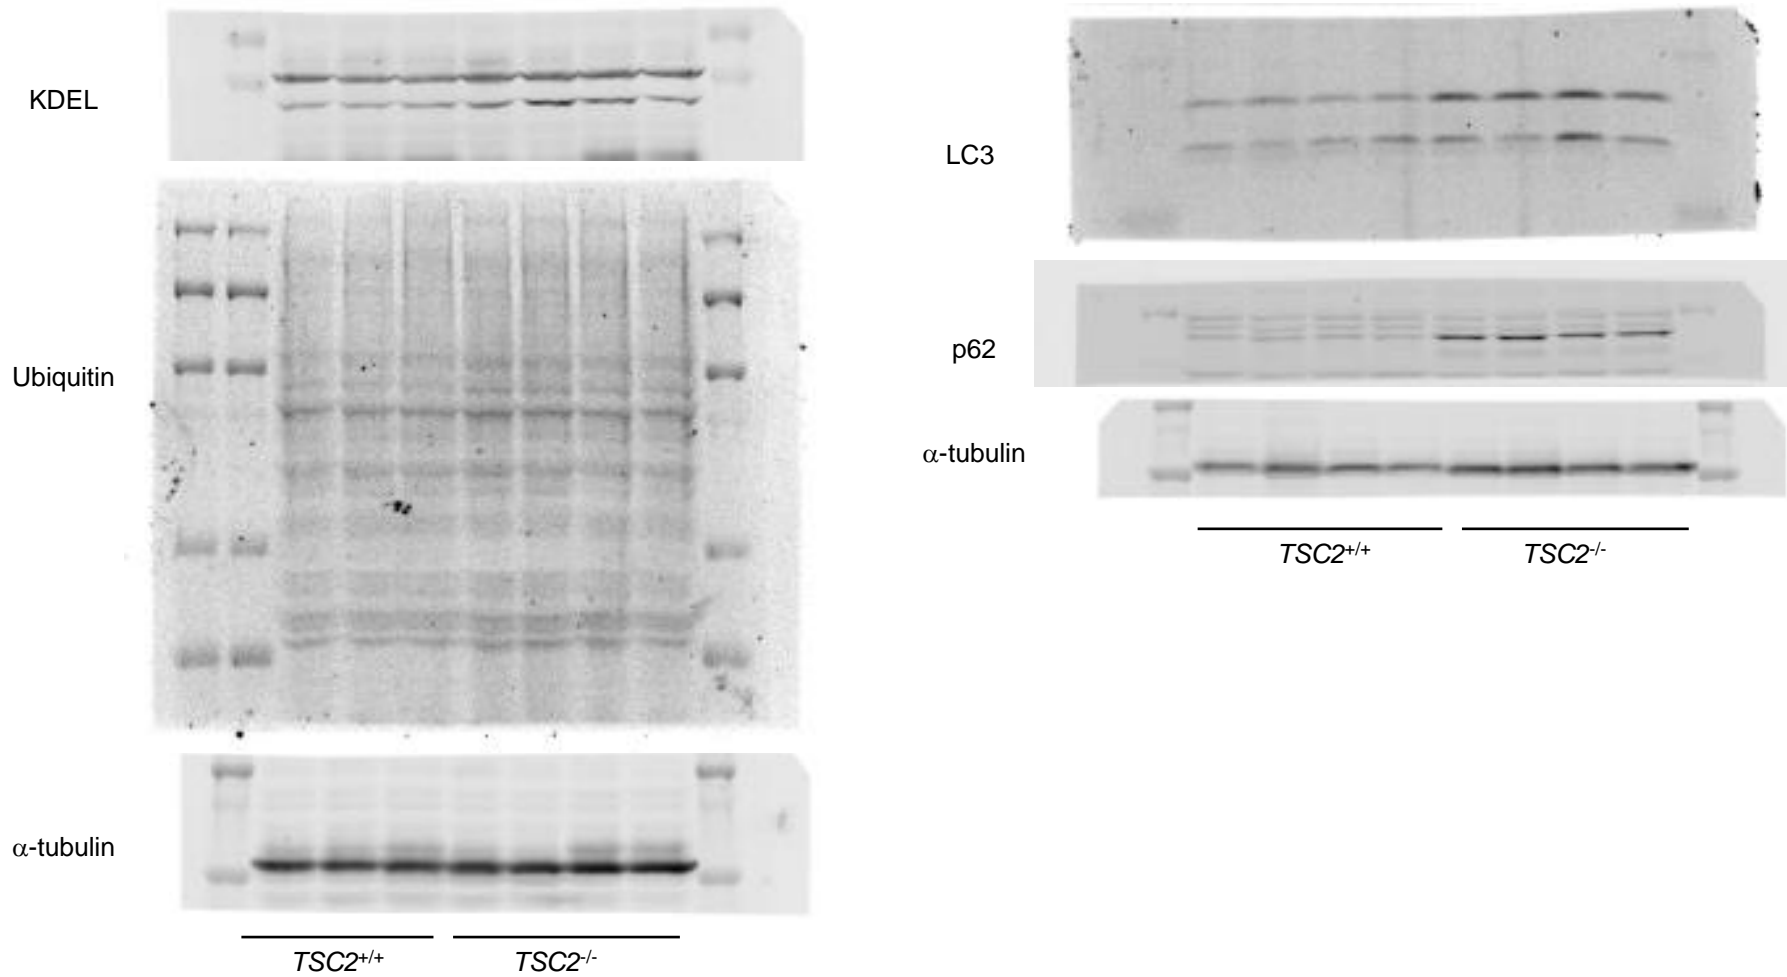

**S2C Fig. The original blots shown in Fig. 3B and C.**

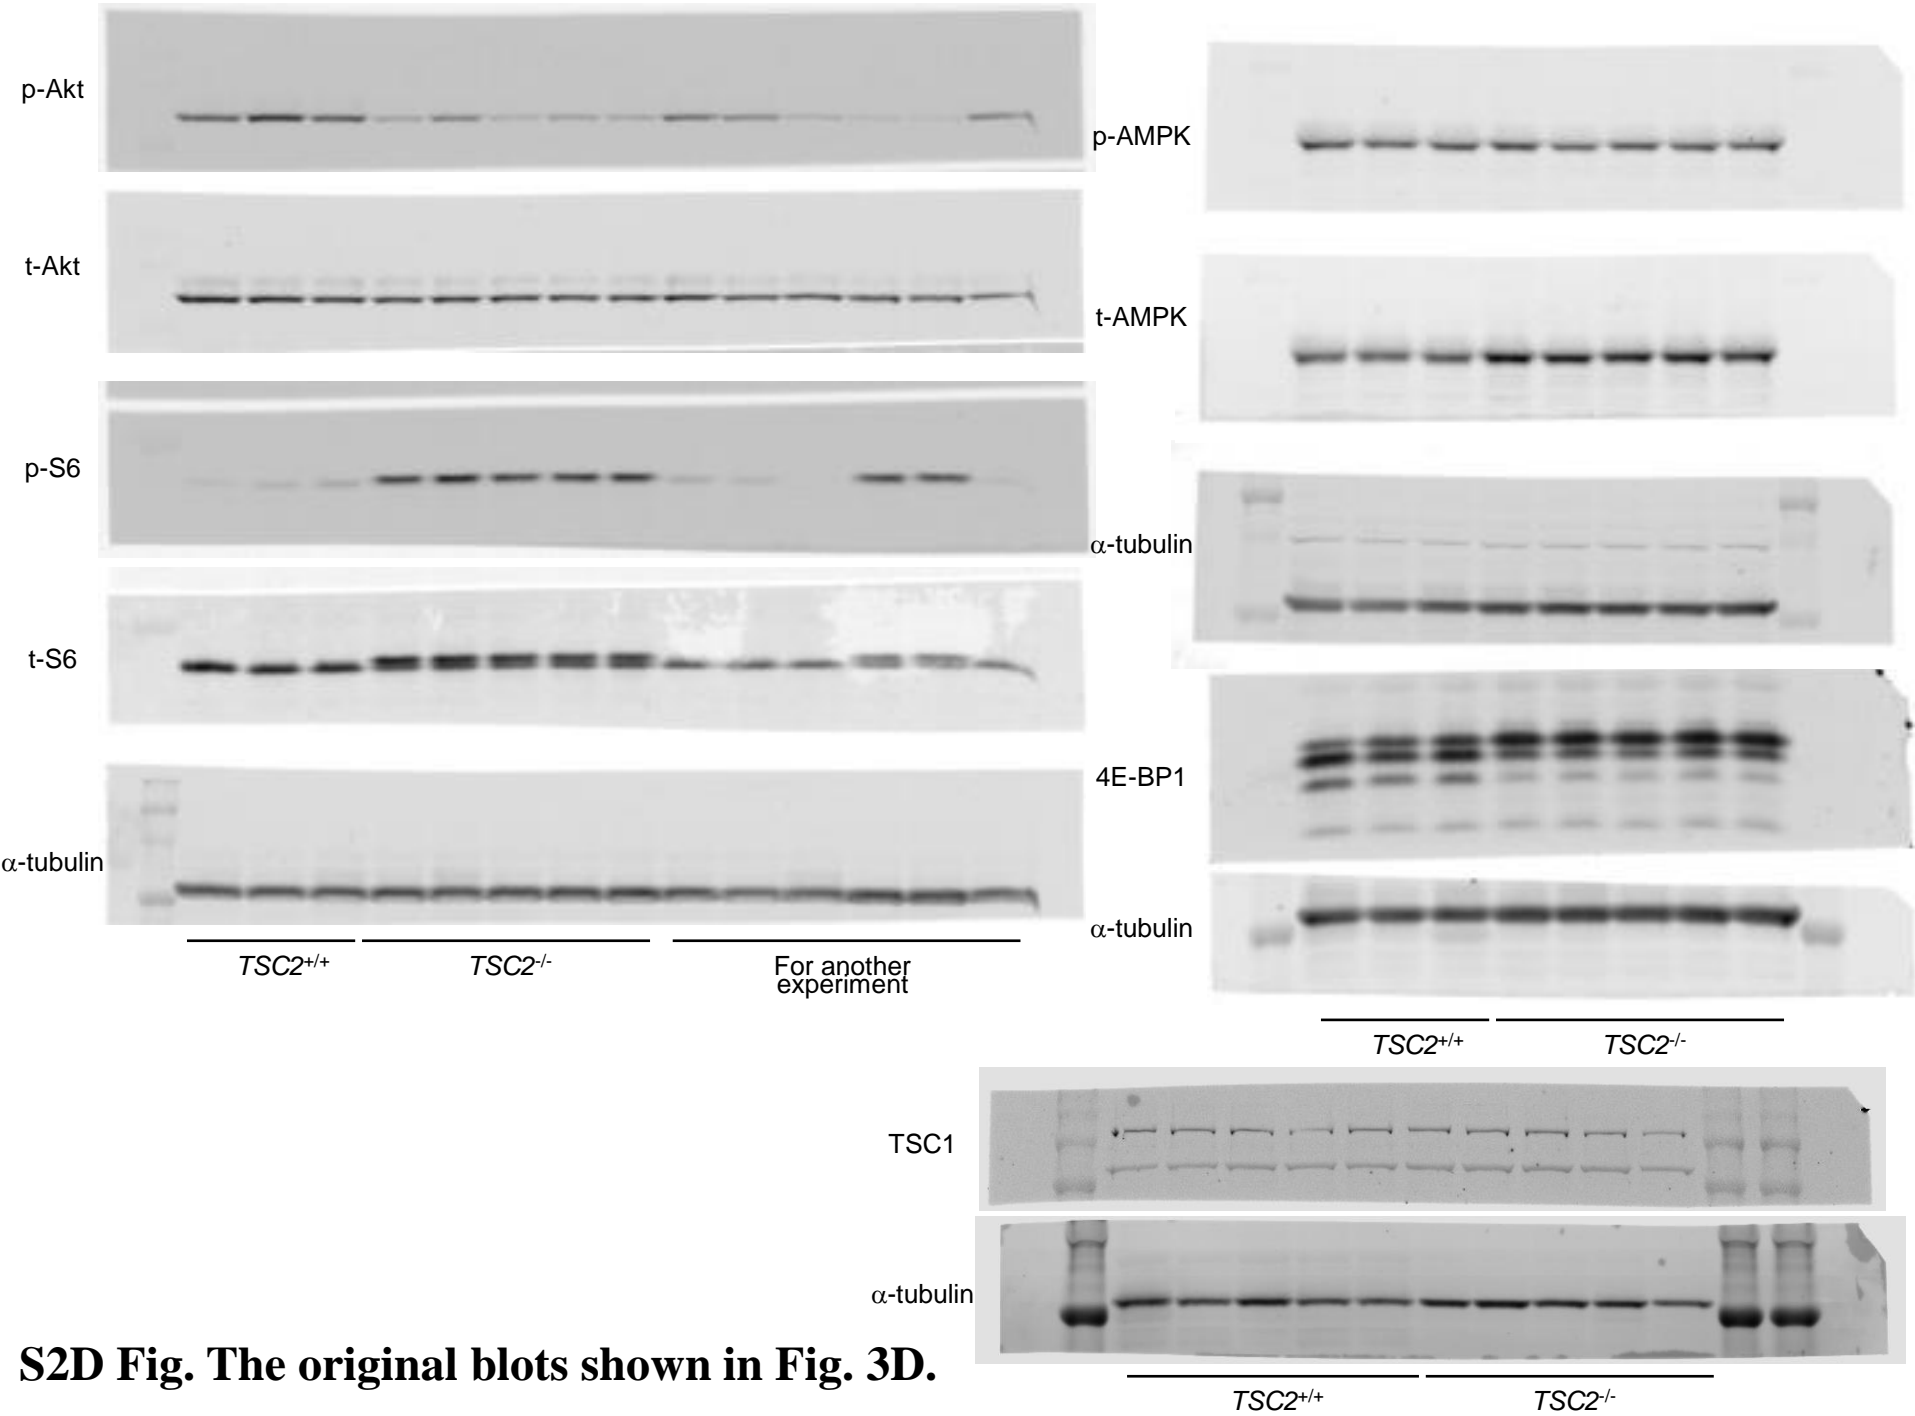

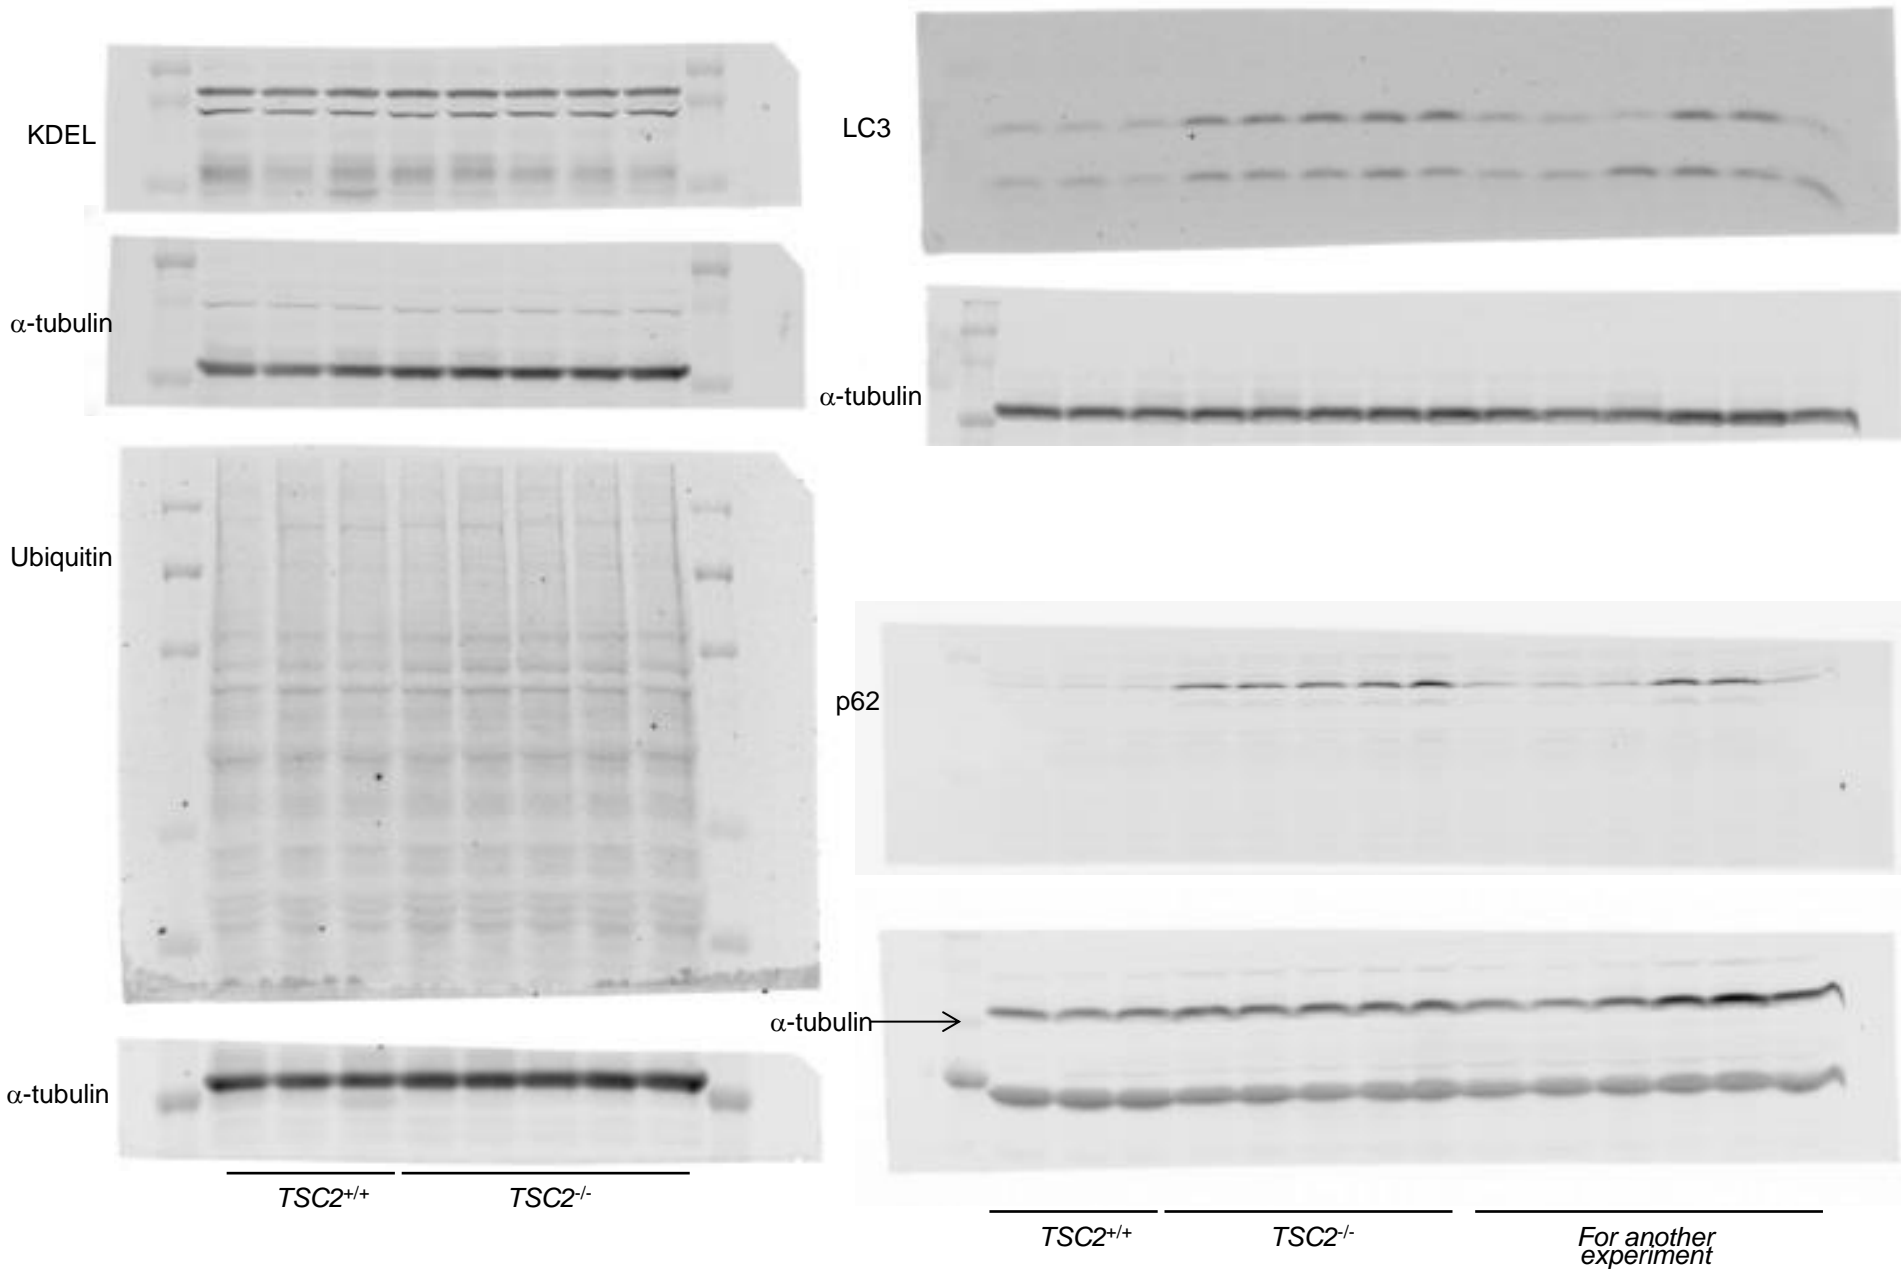

**S2E Fig. The original blots shown in Fig. 3E and F.**

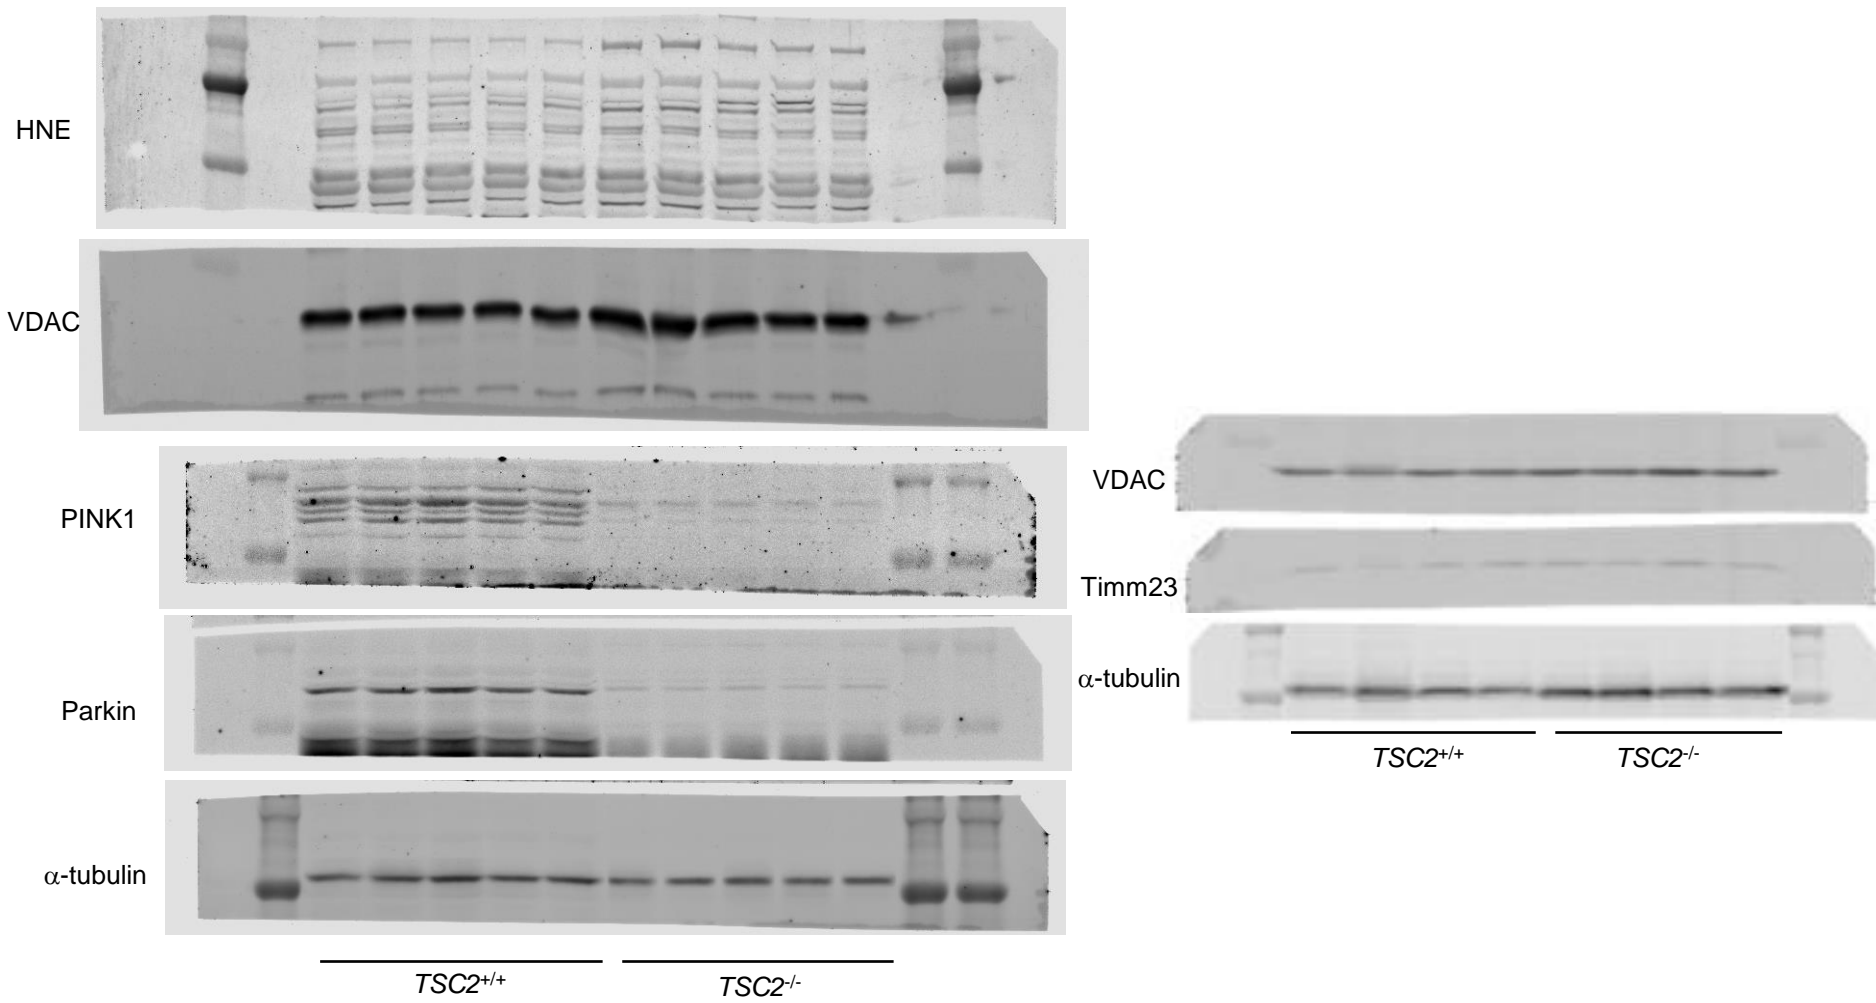

**S2F Fig. The original blots shown in Fig. 4C, D and E.**

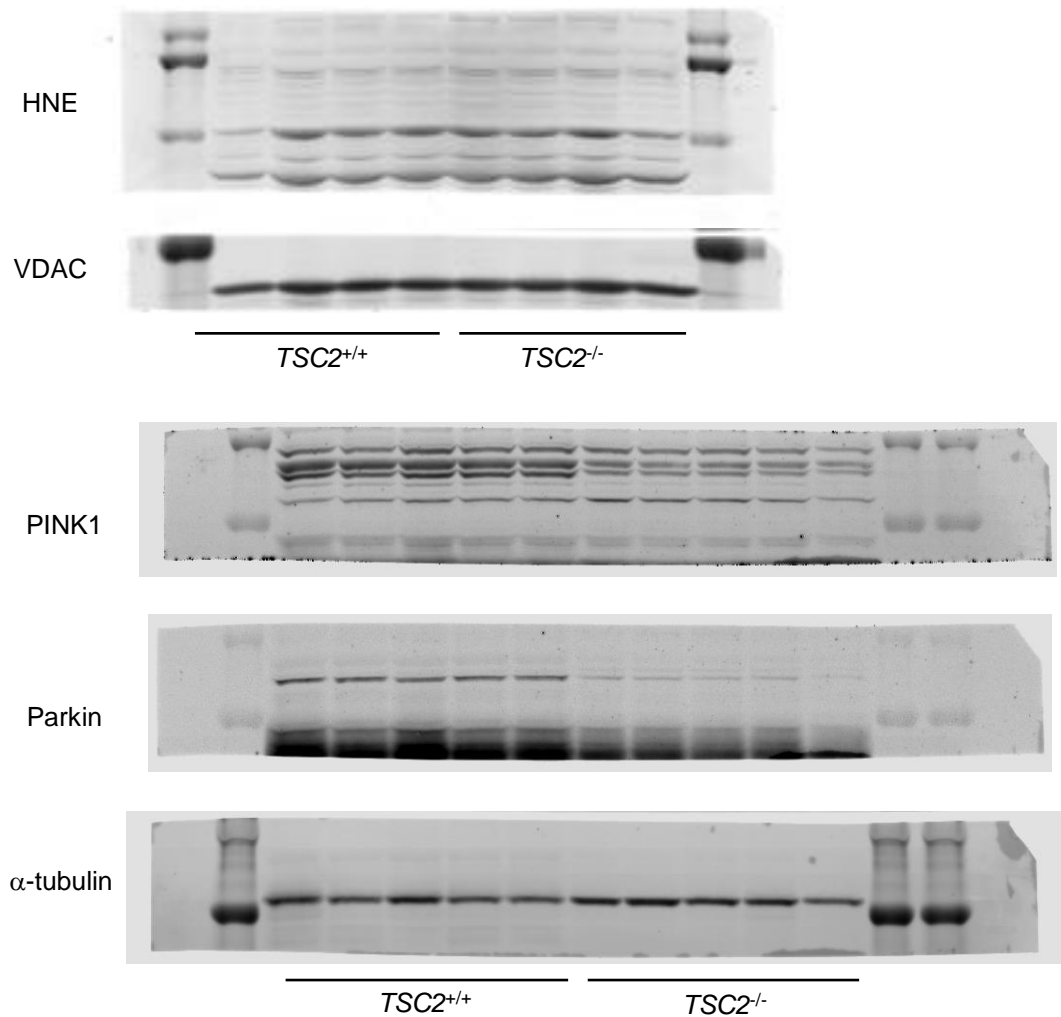

**S2G Fig. The original blots shown in Fig. 4H and I.**

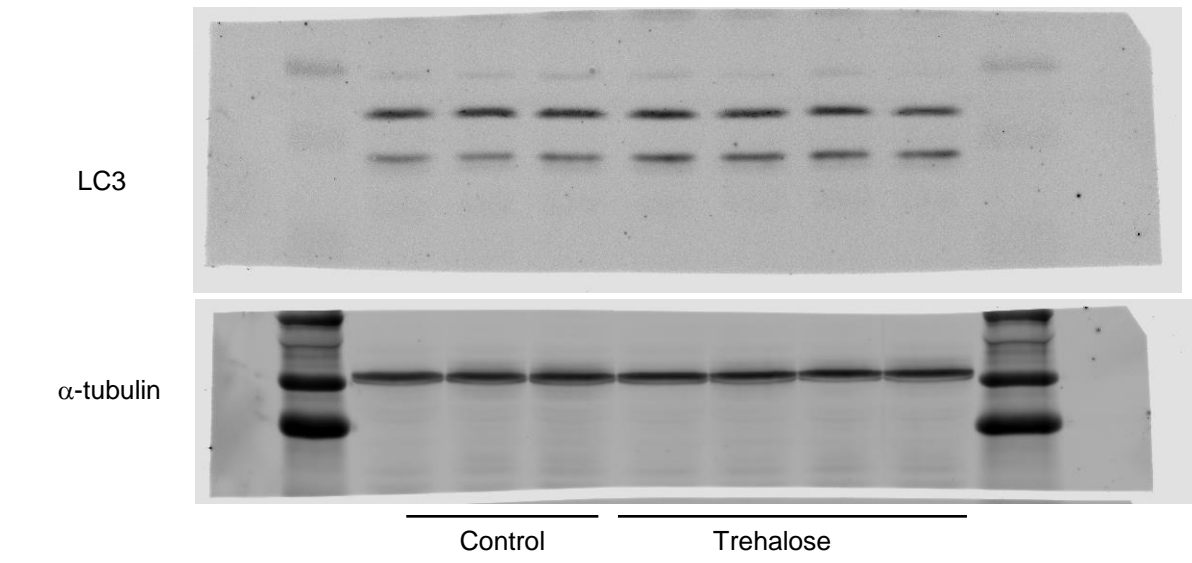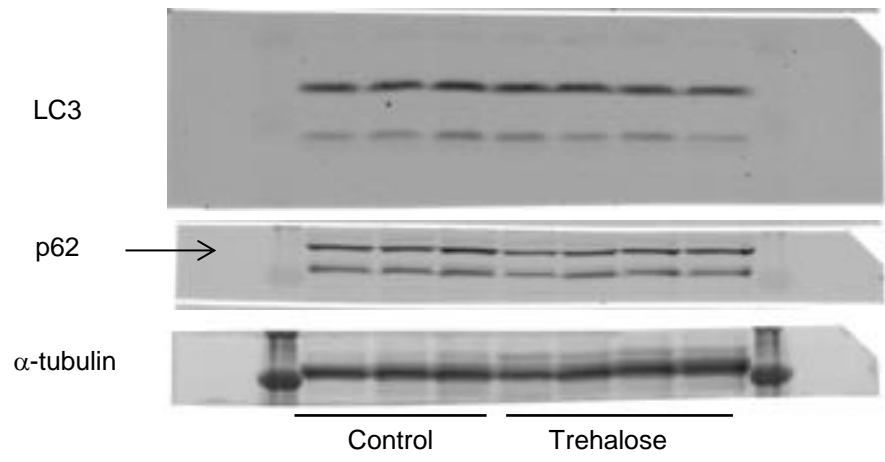

**S2H Fig. The original blots shown in Fig. 6A and D.**
